1 **CXXC1 is redundant for normal DNA double-strand break formation and meiotic**

2 **recombination in mouse**

3 Hui Tian, Timothy Billings, Petko M. Petkov\*

4 The Jackson Laboratory, Bar Harbor, ME 04609, USA

5

6 **Short title: CXXC1 is redundant for meiotic recombination in mouse**

7

8 \*Corresponding author

9 Email: [petko.petkov@jax.org](mailto:petko.petkov@jax.org)

10

11

## 12 **Abstract**

13 In most mammals, including mice and humans, meiotic recombination is determined by the  
14 meiosis specific histone methyltransferase PRDM9, which binds to specific DNA sequences and  
15 trimethylates histone 3 at lysine-4 and lysine-36 at the adjacent nucleosomes. These actions  
16 ensure successful DNA double strand break initiation and repair that occur on the proteinaceous  
17 structure forming the chromosome axis. The process of hotspot association with the axis after  
18 their activation by PRDM9 is poorly understood. Previously, we and others have identified  
19 CXXC1, an ortholog of *S. cerevisiae* Spp1 in mammals, as a PRDM9 interactor. In yeast, Spp1  
20 is a histone methyl reader that links H3K4me3 sites with the recombination machinery,  
21 promoting DSB formation. Here we investigated whether CXXC1 has a similar function in  
22 mouse meiosis. We found that CXXC1 is co-expressed and interacts with PRDM9 in mouse  
23 spermatocytes. To investigate the meiotic function of CXXC1, we created a *Cxxc1* conditional  
24 knockout mouse to deplete CXXC1 before the onset of meiosis. Surprisingly, knockout mice  
25 were fertile, and the loss of CXXC1 in spermatocytes had no effect on hotspot trimethylation  
26 activity, double-strand break formation or repair. Our results demonstrate that CXXC1 is not an  
27 essential link between recombination hotspot sites and DSB machinery and that the hotspot  
28 recognition pathway in mouse is independent of CXXC1.

29

30

## 31 **Author Summary**

32 Meiotic recombination increases genetic diversity by ensuring novel combination of alleles  
33 passing onto the next generation correctly. In most mammals, the meiotic recombination sites  
34 are determined by histone methyltransferase PRDM9. These sites subsequently become  
35 associated with the chromosome axis with the participation of additional proteins and undergo  
36 double strand breaks, which are repaired by homologous recombination. In *Saccharomyces*

37 *cerevisiae*, Spp1 (ortholog of CXXC1) binds to methylated H3K4 and connects these sites with  
38 chromosome axis promoting DSB formation. However, our data suggest that even though  
39 CXXC1 interacts with PRDM9 in male germ cells, it does not play a crucial role in mouse  
40 meiotic recombination. These results indicate that, unlike in *S. cerevisiae*, a recombination  
41 initiation pathway that includes CXXC1 could only serve as a non-essential pathway in mouse  
42 meiotic recombination.

43

## 44 **Introduction**

45 Meiotic recombination ensures production of fertile gametes with a correct haploid chromosome  
46 number and genetic diversity [1]. In most of mammals, the meiotic recombination sites are  
47 restricted to 1-2 kb regions, locations of which are determined by the DNA binding histone  
48 methyltransferase PRDM9 [2-4]. Recombination initiates when PRDM9 binds to hotspots  
49 sequences with its zinc finger domain and trimethylates histone 3 at lysine 4 (H3K4me3) and  
50 lysine 36 (H3K36me3) resulting in formation of a nucleosome-depleted region [2-6]. DNA double  
51 strand breaks (DSB) are created at the nucleosome-depleted regions of activated hotspots [7-  
52 10], and eventually repaired as either crossovers or non-crossover conversions. Cytological  
53 staining for several proteins associated with DSB processing in early meiotic prophase show  
54 that, from the earliest time of their detection, DSB are associated with a proteinaceous structure  
55 known as chromosome axis [11-14]. We have previously shown that PRMD9 is associated, but  
56 not directly interacting, with chromosome axis elements such as phosphorylated REC8 (pREC8)  
57 and SYCP3 in spermatocytes [15]. Efficient trimethylation at hotspots and correct association  
58 between PRDM9 and certain chromosomal axis elements are crucial for normal DSB formation  
59 and repair [16]. However, we currently do not have detailed knowledge of the proteins and  
60 molecular mechanisms participating in hotspot association with chromosome axis.

61

62 In *Saccharomyces cerevisiae*, which has no PRDM9, the PHD zinc finger protein Spp1, a  
63 member of COMPASS (Complex associated with Set1), acts as a histone H3K4 methyl reader  
64 and promotes meiotic DSB formation at the existing H3K4me3 sites, such as promoters [17].  
65 Spp1 is predominantly located on the chromosome axes and connects H3K4 trimethylated sites  
66 with the axis protein Mer2 to stimulate Spo11 dependent DSB formation [17,18]. Recent study  
67 showed that Spp1 function in tethering DSB sites to chromosome axes and ensuring efficient  
68 DSB formation is independent of its function as a COMPASS complex member [19].  
69  
70 CxxC finger protein 1 (CXXC1, CFP1, CGBP) is an ortholog of *S. cerevisiae* Spp1 in mammals.  
71 In somatic cells, CXXC1 binds to both unmethylated CpGs and SETD1, which is required for  
72 trimethylation of H3K4 at CpG islands [20]. CXXC1 is crucial for embryonic stem cell  
73 maintaining and development [21,22]. Knockout of *Cxxc1* in mouse results in lethality at the  
74 early embryonic stages [23]. We have reported that CXXC1 interacts with PRDM9 *in vitro* [15].  
75 This interaction has recently been confirmed by another group, which also reported that CXXC1  
76 interacts with the chromosome axis element IHO1 by yeast two-hybrid assay [24]. IHO1 is  
77 considered to be the ortholog of yeast Mer2 and is known to be essential for ensuring efficient  
78 DSB formation [25], therefore it is possible that CXXC1-IHO1 interaction serves the same  
79 function in mammalian meiosis as their orthologs Spp1-Mer2 in yeast. However, the function of  
80 CXXC1 in mammalian meiosis has not been characterized so far. It has been unclear whether  
81 CXXC1 binds to PRDM9 in germ cells and whether it participates in meiotic recombination  
82 initiation in any way, either as a partner of PRDM9 or as a methyl reader of  
83 H3K4me3/H3K36me3 marks that PRDM9 imposes at the nucleosomes surrounding the  
84 recombination hotspots.  
85  
86 To address whether and how CXXC1 functions in meiotic recombination, we created a *Cxxc1*  
87 conditional knockout mouse model and deleted *Cxxc1* at the onset of meiosis. We found that

88 CXXC1 is co-expressed with PRDM9 and indeed interacts with it in spermatocytes. However,  
89 loss of CXXC1 does not affect normal meiotic recombination process. Our study demonstrates  
90 that the presence of CXXC1 in mouse meiosis is redundant, and unlike its *S. cerevisiae* ortholog  
91 Spp1, CXXC1 does not appear to be a key factor for the DSB formation.

92

## 93 **Results**

### 94 **CXXC1 interacts with PRDM9 in spermatocytes**

95 We tested whether CXXC1 interacts with PRDM9 *in vivo* by co-immunoprecipitation (co-IP) from  
96 spermatocytes isolated from 14 dpp B6 testis using antibody against PRDM9. We found that  
97 CXXC1 indeed interacts with PRDM9 in spermatocytes (Fig 1A). However, the interaction was  
98 not as strong as PRDM9's predominant interactor EWSR1 (Fig 1A) [15], which raised the  
99 possibility that the interaction between CXXC1 and PRDM9 could be mediated by the stronger  
100 PRDM9 interactors. To test whether this is the case, we performed co-IP with EWSR1 and did  
101 not detect any interaction with CXXC1 in testicular extract (Fig 1B). To further test the  
102 interactions between the three proteins, CXXC1, PRDM9 and EWSR1, we co-expressed Myc-  
103 tagged mouse CXXC1, HA-tagged EWSR1 and Flag-tagged PRDM9 proteins in human  
104 embryonal kidney 293 (HEK293) cells, and performed co-IP with antibodies against HA or Myc  
105 tags. Both EWSR1 and CXXC1 immunoprecipitated PRDM9 under these conditions, but there  
106 was no interaction between CXXC1 and EWSR1 in the presence or absence of PRDM9 (Fig  
107 1C).

108

109 Several reports have shown that Spp1, the yeast ortholog of CXXC1, binds to H3K4me3 and  
110 tethers H3K4-trimethylated recombination hotspots to the chromosome axis [17-19]. To test  
111 whether CXXC1 binds to H3K4me3 in mouse spermatocytes, we performed CXXC1 co-IP from  
112 B6 testicular extract. Indeed, we detected CXXC1 interaction with H3K4me3 but not with the

113 closed chromatin marker H3K9me3 (Fig 1D). These data raise the possibility that the *in vivo*  
114 interaction between PRDM9 and CXXC1 could be mediated by trimethylated H3K4. To further  
115 investigate that, we performed PRDM9 co-IP from the testicular extract isolated from a PRDM9  
116 PR/SET domain mutation mouse model (*Prdm9<sup>Set-/Set-</sup>*), in which hotspots are not trimethylated  
117 (unpublished data). We did not detect any interaction between CXXC1 and PRDM9 in the  
118 mutant testicular extract (Fig 1E), which indicates that CXXC1 binding to PRDM9 may be  
119 mediated or at least facilitated by trimethylated H3K4 at hotspots.

120

121 These results indicate that CXXC1 and EWSR1 form separate complexes with PRDM9. They  
122 also indicate that although CXXC1 interacts with PRDM9 *in vivo*, it is not a predominant  
123 interactor of PRDM9, and that their interaction could be mediated by other proteins such as  
124 histone 3 trimethylated at lysine-4.

125

### 126 **CXXC1 is co-expressed with PRDM9 in leptonema and zygonema**

127 In seminiferous tubules of mouse testis, CXXC1 is expressed in both germ cells and Sertoli cells  
128 (Fig 2A, top panel). CXXC1 showed high expression in spermatogonia, low expression in  
129 leptonema and zygonema, and then again high expression in pachynema and diplonema,  
130 decreasing to undetectable levels in spermatids (Fig 2A, top panel).

131

132 Previous reports showed that PRDM9 is present only in leptonema and zygonema during  
133 meiosis [26]. Double staining for PRDM9 and CXXC1 showed co-expression of these two  
134 proteins in nuclei from stage X seminiferous tubules (Fig 2A, top panel) and in 14 dpp testis (Fig  
135 2A, middle panel), when the majority of spermatocytes are at leptotene and zygotene stages.  
136 Since CXXC1 interacts with PRDM9 *in vivo* (Fig 1A), we performed CXXC1 staining in *Prdm9*  
137 knockout mouse testis (*Prdm9<sup>-/-</sup>*) to determine whether CXXC1 localization could be affected by  
138 the absence of PRDM9. In this mutant, CXXC1 showed the same localization pattern as in

139 controls (Fig 2A, bottom panel). The co-expression pattern of PRDM9 and CXXC1 in leptonema  
140 and zygonema was further confirmed by chromosome spreads, where CXXC1 showed diffused  
141 signal over the entire nuclear region (Fig 2B).

142

143 These results suggest that CXXC1 is co-expressed with PRDM9 in leptonema and zygonema,  
144 and that its expression and localization are not affected by the presence or absence of PRDM9.

145

### 146 **Male *Cxxc1* knockout mice are fertile**

147 To test whether CXXC1 is involved in spermatogenesis, we generated a conditional knockout  
148 (CKO) model using CRISPR/Cas9 to insert loxP sites flanking exon 2 and 3 of *Cxxc1* in  
149 C57BL/6J. We bred early spermatogonia-specific knockout mice (*Cxxc1*<sup>loxP/Δ;Stra8-iCre</sup>, hereafter  
150 *Cxxc1* CKO) by crossing the *Cxxc1*<sup>loxP/loxP</sup> mice with *Stra8-iCre* mice. Western blot confirmed  
151 that in knockout testes, the protein level of CXXC1 is reduced (Fig 3A). CXXC1 was absent in  
152 spermatocytes of the CKO, but present in spermatogonia and Sertoli cells (Fig. 3B).

153

154 We performed fertility test with two CKO mice. To our surprise, both CKO mice were fertile and  
155 produced similar number of viable progeny compared to the heterozygous (het) and B6 controls  
156 (Fig 3C). Testis index (testis weight/body weight) was the same in CKO as in het and wild type  
157 B6 controls (Fig. 3D). Histology of testis and epididymis from CKO mice showed no detectable  
158 spermatogenesis defects (Fig 3E). In contrast, *Cxxc1* oocyte-specific knockout female mice with  
159 *Ddx4-Cre* are sterile -- no viable pup produced from homozygous knockout (*Cxxc1*<sup>loxP/Δ;Ddx4-Cre</sup>)  
160 mating test, while the heterozygous control (*Cxxc1*<sup>loxP/+;Ddx4-Cre</sup>) mating produced normal number  
161 of pups (5.3 ± 1.7); however, their sterility is due to early embryonic developmental deficiency  
162 and not meiotic defects [27].

163

164 **Expression and function of PRDM9 remains normal in *Cxxc1* CKO**

165 We further tested whether CXXC1 affects the localization, the expression pattern, or the  
166 function of PRDM9. Localization of PRDM9 in seminiferous tubules was preserved in CKO as  
167 determined by immunostaining (Fig 4A). In addition, the expression pattern of PRDM9 in  
168 leptoneuma and zygoneuma was not affected in the absence of CXXC1 (Fig 4B).

169  
170 To test whether lack of CXXC1 affects PRDM9 methyltransferase function, we first compared  
171 H3K4me3 patterns in control and *Cxxc1* CKO mice. Both control and CKO chromosome  
172 spreads showed abundant H3K4me3 signal in leptoneuma and zygoneuma, lower signal in  
173 pachyneuma and increased signal in diploneuma (Fig 4C). In addition, the H3K4me3 staining on  
174 cross sections of CKO testis showed no decrease (Fig S1). These data indicate that the hotspot  
175 trimethylation and transcriptional activation in spermatocytes are not affected by the loss of  
176 CXXC1.

177  
178 Second, we determined whether loss of CXXC1 affects PRDM9 binding and its  
179 methyltransferase activity at individual hotspots by H3K4me3 ChIP-qPCR. We found that  
180 H3K4me3 enrichment at *Dom2* hotspots *Pbx1* and *Fcgr4* was not different in B6 control, *Cxxc1*  
181 heterozygous and CKO. We measured as a control the H3K4me3 enrichment at promoter  
182 regions of housekeeping gene *Actinb* and meiotic specific gene *Sycp3*, which are not PRDM9-  
183 dependent. These were not changed as well (Fig 4D).

184  
185 These results suggest that loss of CXXC1 does not affect PRDM9 expression, binding to  
186 hotspots, or its catalytic function. Therefore, CXXC1 is not required for PRDM9-dependent  
187 hotspot activation.

188



189 **Meiotic DSB formation and repair are normal in *Cxxc1* CKO**

190 Next, we tested whether lack of CXXC1 affects chromosome synapsis, DSB formation and  
191 repair process. Co-staining of SYCP1 and SYCP3 showed normal synapsis in all autosomes at  
192 pachytene stage in CKO spermatocytes. We did not detect increased chromosome asynapsis  
193 in the CKO spermatocytes compared to controls (Fig 5A).

194  
195 DSB formation was not affected by the loss of CXXC1 either, when measured by the number of  
196 foci of DMC1, the protein that binds to the single stranded DNA tails at DSB sites [7,8] (Fig 5B).  
197 We used staining for phosphorylated H2AX ( $\gamma$ H2AX), which marks unrepaired DNA lesions, to  
198 test for the processing of recombination repair. The pattern of  $\gamma$ H2AX staining was not changed  
199 in CKO compared to the het control spermatocytes, showing  $\gamma$ H2AX signal throughout the  
200 nucleus in leptotene spermatocytes when DSBs occur, which was then restricted to the sex  
201 body in pachytene spermatocytes when the autosomal breaks are repaired (Fig 5C).

202  
203 Finally, we examined whether loss of CXXC1 affects crossover determination process. Using  
204 MLH1 as a marker of crossover sites, we did not find any significant change of crossover  
205 number in the CKO spermatocytes compared to the het controls (Fig 5D).

206  
207 Taken together, these results suggest that even though CXXC1 interacts with PRDM9 and  
208 H3K4me3 in spermatocytes, it is not required for PRDM9 binding at hotspots, their subsequent  
209 activation by PRDM9-dependent H3K4 trimethylation, DSB formation, repair, or crossover  
210 formation, and is therefore redundant for meiotic recombination events.

211

212

213

## 214 Discussion

215 In this study, we demonstrate that CXXC1 interacts with PRDM9 in spermatocytes. However,  
216 CXXC1 is not a predominant interactor of PRDM9 and its binding to PRDM9 depends on the  
217 catalytic activity of PRDM9. The germ cell specific *Cxxc1* knockout male mice are fertile. In the  
218 knockout spermatocytes, the expression and function of PRDM9 are unchanged. The loss of  
219 CXXC1 does not affect DSB formation and repair, chromosome pairing and synapsis, and  
220 crossover numbers. Together, these results convincingly show that CXXC1 is redundant for  
221 normal meiotic recombination events and spermatogenesis.

222  
223 The yeast CXXC1 ortholog Spp1 is a key player in recombination by linking H3K4me3 sites with  
224 the chromosome axis and connecting them with the recombination protein Mer2 [17-19]. These  
225 observations suggested that CXXC1 might play similar function in mammalian meiosis.

226 However, our results show that CXXC1 is not an essential player in mammalian recombination  
227 where PRDM9 controls the initial recognition and activation of recombination hotspots, because  
228 in the absence of CXXC1, hotspot activation, axis integrity, DSB formation and crossover  
229 resolution occur normally. This suggests that PRDM9 dependent DSB formation and  
230 recombination determination pathway in most of mammals differs from that in the budding yeast.

231 In species with functional PRDM9, the function of RMM complex consisting of orthologs of the  
232 yeast Rec114, Mei4 and Mer2 (REC114, MEI4 and IHO1 in mice) is still conserved [25,28-30],  
233 and the association between hotspots and chromosome axis is crucial for efficient DSB  
234 formation [25,31,32]. However, the interaction between CXXC1 and IHO1 does not seem to play  
235 the same functional role as the one between Spp1 and Mer2 in yeast. One important difference  
236 is that in organisms that do not use PRDM9, DSB occur at H3K4me3 sites, whereas in those  
237 that use PRDM9, DSB occur at hotspots where surrounding nucleosomes are methylated at  
238 both H3K4 and H3K36 [5,6]. This raises the likelihood that proteins with H3K36me3 methyl-

239 reading activity, such as PWWP domain containing proteins [33], or with both H3K4me and  
240 H3K36me binding capability, such as Tudor domain containing proteins [34], might be involved  
241 in hotspot recognition in these species. Alternatively, activated hotspots may be recruited to the  
242 chromosome axis and DSB machinery without assistance of an H3K4me3/H3K36me3 reader. A  
243 recent study demonstrated that randomized DSBs induced by radiation in *Spo11* mutant  
244 spermatocytes are associated with chromosome axis and can successfully recruit DSB repair  
245 proteins such as DMC1/RAD51 complex [35]. Other direct PRDM9 interactors, such as EWSR1,  
246 EHMT2, and CDYL, could also be involved in hotspot association with the chromosome axis  
247 [15].

248

249 An alternative, PRDM9-independent pathway, can explain the fraction of DSB detected at  
250 promoters in wild type mice, and all DSB in PRDM9 mutant mice [8,36]. This pathway could  
251 involve CXXC1 as part of the SETD1 complex, known to bind H3K4me3 at promoters, in a way  
252 similar to Spp1-Mer2 role in yeast meiosis. It is not an essential pathway in most organisms  
253 using PRDM9 as hotspot determinant, but may play a major role in those lacking PRDM9, such  
254 as canids [37-39], where recombination hotspots are enriched in CpG-rich regions with a  
255 preference for unmethylated CpG islands [8,16,37,40], similar feature as CXXC1 binding sites  
256 [20,41]. A recent finding of a woman, who has no active PRDM9 but is fertile, suggests that this  
257 pathway may become activated and ensure proper recombination even in organisms using  
258 PRDM9 as a recombination regulator [42].

259

## 260 **Methods**

### 261 **Mouse models**

262 All wild-type mice used in this study were in the C57BL/6J (B6) background. Exon 2 and exon 3  
263 of *Cxxc1* were flanked by two loxP sites using CRISPR. The *Cxxc1* conditional knockout mice

264 used in this study were produced by a two-step deletion scheme. Mice that harbor two  
265 conditional *Cxxc1* alleles (*Cxxc1<sup>loxp/loxp</sup>*) were mated to Tg(Sox2-cre)1Amc/J mice (stock  
266 #004783) to generate one *Cxxc1* allele deleted mice. The *Cxxc1* hemizygous mice (*Cxxc1<sup>Δ/+</sup>*)  
267 were mated to Tg(Stra8-icre)1Reb/J (stock #08208) and Tg(Ddx4-cre)1Dcas/KnwJ (stock  
268 #018980) to obtain *Cxxc1<sup>Δ/+;Stra8-iCre</sup>* and *Cxxc1<sup>Δ/+;Ddx4-Cre</sup>* mice. Those *Ewsr1<sup>Δ/+;Stra8-iCre</sup>* and  
269 *Cxxc1<sup>Δ/+;Ddx4-Cre</sup>* mice were then mated to homozygous *Cxxc1 loxp* mice to generate  
270 heterozygous control mice (*Cxxc1<sup>loxp/+;Stra8-iCre</sup>* and *Cxxc1<sup>loxp/+;Ddx4-Cre</sup>* designated as *Cxxc1* controls)  
271 or conditional knockout mice (*Cxxc1<sup>loxp/Δ;Stra8-iCre</sup>* and *Cxxc1<sup>loxp/Δ;Ddx4-Cre</sup>* designated as *Cxxc1*  
272 CKO).

273  
274 B6(Cg)-Prdm9tm2.1Kpgn/Kpgn mice (*Prdm9<sup>Set-/Set-</sup>*) were generated in a previous study  
275 (unpublished data). B6;129P2-*Prdm9<sup>tm1Ymat</sup>*/J mice (*Prdm9<sup>-/-</sup>*) have been previously described  
276 [43]. All animal experiments were approved by the Animal Care and Use Committee of The  
277 Jackson Laboratory (Summary #04008).

278

### 279 **Co-immunoprecipitation assays**

280 The co-IPs for PRDM9 and EWSR1 with testicular extract were carried out using our reported  
281 protocol [15]. Testicular total protein was extracted from twenty 14 dpp B6 and *Prdm9<sup>Set-/Set-</sup>*  
282 with 1 ml of Pierce IP buffer (Thermo Fisher Scientific, 87787). 10% of extract was set apart as  
283 input. The co-IP was performed by incubating extract with protein G Dynabeads conjugated with  
284 antibodies against PRDM9 (custom-made) or guinea pig IgG overnight at 4°C. Then, the beads  
285 were washed three times with 1 ml of Pierce IP buffer, eluted with 200 μl of GST buffer (0.2 M  
286 glycine, 0.1% SDS, 1% Tween 20, pH 2.2) for 20 min at room temperature and neutralized with  
287 40 μl of 1 M Tris-HCl, pH 8. After heated at 95°C for 5 min, 10 μg of IP and input samples were  
288 then subjected to electrophoresis and western blotting for detection of PRDM9 (1:1000, custom

289 made), EWSR1 (1:1000, Abcam, ab54708), CXXC1 (1:1000, Abcam, ab198977) and CTCF  
290 (1:1000, Abcam, ab70303).

291

292 The co-IP for CXXC1 was performed with isolated germ cells. Briefly, the seminiferous tubules  
293 were digested with liberase and the germ cells were isolated. Then, the nuclei were isolated by  
294 incubation germ cells in hypotonic lysis buffer (10 mM Tris-HCL pH 8.0, 1 mM KCl, 1.5 mM  
295 MgCl<sub>2</sub>) for 30 min at 4°C and spinning down at 10,000 g for 10 min. The nuclear extract was  
296 obtain by incubation with the nuclei lysis buffer (50 mM HEPES, pH 7.8, 3 mM MgCl<sub>2</sub>, 300 mM  
297 NaCl, 1 mM DTT and 0.1 mM PMSF), 5 U/μl DNaseI and 2 U/ μl Turbonuclease for 30 min at  
298 4°C. 10% of extract was saved as input. The co-IP was perform by incubating extract with  
299 protein G Dynabeads conjugated with antibodies against CXXC1 (Abcam, ab198977) or guinea  
300 pig IgG overnight at 4°C. After wash and elution, the IP and input samples were then subjected  
301 to electrophoresis and western blotting for detection of CXXC1 (1:1000, Abcam, ab198977),  
302 H3K4me3 (1:1000, Millipore, #07-473) and H3K9me3 (1:1000, Active Motif, 39766).

303

### 304 **Measurement of testis index**

305 Testicular weight and body weight of adult B6 (n = 3), *Cxxc1* het (n = 3) and CKO (n = 4) mice  
306 were measured. Testis index was calculated as testis weight/body weight. Student's t-test was  
307 used to determine the statistical significance.

308

### 309 **Fertility test**

310 Fertility test was performed with 3 *Cxxc1* het control and 5 CKO male mice. Each mouse was  
311 mated with at least two B6 females for at least two month period. Litter size and viable pup  
312 number were record.

313

## 314 **Histology**

315 Testis and epididymis from adult *Cxxc1* het control or CKO mice were dissected out, fixed with  
316 Bouin's solution, and embedded in paraffin wax, and sectioned at 5  $\mu$ m. Sections of testis were  
317 stained with Periodic acid–Schiff–diastase (PAS), and section of epididymis were stained with  
318 haematoxylin and eosin (HE) using standard techniques.

319

## 320 **Chromosome spread and FISH**

321 The drying-down technique [44] was used for preparation of chromosome spreads from  
322 spermatocytes of 14-dpp and 8-weeks B6, *Cxxc1* control or CKO mice. Chromosome spread  
323 slides were immunolabeled with anti-PRDM9 (1:200), CXXC1 (1:1000), SYCP1 (1:300, Novus,  
324 NB300-229), SYCP3 (1:400, Novus, NB300-231),  $\gamma$ H2AX (1:1000, Abcam, ab26350), DMC1  
325 (1:200, Santa Cruz, sc-8973) or MLH1 (1:100, BD Pharmingen, 550838) antibodies.

326

## 327 **Immunofluorescence**

328 For protein immunolocalization on tissue sections, testicular tissues from 8 week old B6, *Prdm9*  
329 <sup>-/-</sup>, *Cxxc1* control and CKO mice were dissected out, fixed with 4% paraformaldehyde solution  
330 overnight, embedded in paraffin wax. 5- $\mu$ m sections were prepared. For antigen retrieval,  
331 sections were heated in a microwave in Tris-EDTA buffer (10mM Tris, 1mM EDTA and 0.05%  
332 Tween 20, pH 9.0) for 10 min and cooled down to room temperature. Then, sections were  
333 treated with PBS containing 0.1% Triton X-100, blocked with 10% normal donkey serum, and  
334 stained with antibodies against EWSR1 (1:200), PRDM9 (1:200), CXXC1 (1:1000).

335

## 336 **Chromatin immunoprecipitation and real-time PCR**

337 Chromatin immunoprecipitation (ChIP) was performed as previously described [45]. Briefly,  
338 spermatocytes were isolated from 14-dpp B6, *Cxxc1* het and CKO spermatocytes, and

339 crosslinked using 1% formaldehyde. Nuclei were isolated using hypotonic lysis buffer (10 mM  
340 Tris-HCL pH 8.0, 1 mM KCl, 1.5 mM MgCl<sub>2</sub>) and digested by MNase. The ChIP was done using  
341 antibody against H3K4me3 (Millipore, #07-473). Real-time PCR was performed with purified  
342 ChIP DNA using Quantifast SYBR Green PCR Kit (Qiagen) Primer sequences used for real-  
343 time PCR are: *Pbx1*\_F: AGAAACTGACATATGAAGGCTCA; *Pbx1*\_R:  
344 GCTTTTGCTCCCTTAAACTGG; *Fcgr4*\_F: CAAGGTGCATTCTTAGGAGAGA; *Fcgr4*\_R:  
345 TTAATGCTTGCCTCACGTTC; *Hlx1*\_F: GGTCGGTGTGAGTATTAGACG; *Hlx1*\_R:  
346 GGCTACTATACCTTATGCTCTG; *Actinb*\_promoter\_F: GCCATAAAAGGCAACTTTTCG;  
347 *Actinb*\_promoter\_R: TTTCAAAGGAGGGGAGAGG; *Sycp3*\_promoter\_F:  
348 AAGGCGCCACAACCAAGG; *Sycp3*\_promoter\_F: TGCCTGGATGCCCAACTC.

349

## 350 **Acknowledgments**

351 We thank all members of Petkov and Paigen labs, Mary Ann Handel and Ewelina Bolcun-Filas  
352 for their helpful comments, and Anita Adams for technical help.

353

## 354 **Author contributions**

355 HT and PMP designed the experiments. HT and TB performed the experiments. HT and PMP  
356 analyzed the results. HT and PMP wrote the paper.

357

## 358 **Figure Legends**

### 359 **Fig 1. CXXC1 interacts with PRDM9 in spermatocytes.**

360 (A) Co-IP with PRDM9 from 14 dpp B6 testicular extract. Staining for PRDM9, CXXC1, EWSR1  
361 and CTCF. In each blot, lane 1- input; lane 2 – co-IP with non-immune IgG; lane 3 – co-IP with  
362 antibody against PRDM9.

363 (B) Co-IP with EWSR1 from 14 dpp B6 testicular extract. Staining for CXXC1 and EWSR1. In  
364 each blot, lane 1- input; lane 2 – co-IP with non-immune IgG; lane 3 – co-IP with anti-EWSR1  
365 after DNase I treatment; co-IP with anti-EWSR1 without DNase I treatment.

366 (C) Myc tagged CXXC1, HA tagged EWSR1 and Flag tagged PRDM9 were transfected into  
367 HEK293 cells. Co-IP with HA or Myc antibody was performed. The indicated proteins are  
368 stained.

369 (D) Co-IP with CXXC1 from 14 dpp B6 testicular extract showed there is interaction between  
370 CXXC1 and H3K4me3. H3K9me3 is used as a negative control.

371 (E) Co-IP with PRDM9 from 14 dpp *Prdm9*<sup>Set-/Set-</sup> testicular extract. Staining for PRDM9 and  
372 CXXC1. In each blot, lane 1- input; lane 2 – co-IP with non-immune IgG; lane 3 – co-IP with  
373 antibody against PRDM9.

374

### 375 **Fig 2. CXXC1 is co-expressed in the spermatocytes with PRDM9.**

376 (A) Co-immunofluorescence staining of CXXC1 and PRDM9 on adult B6, 14-dpp B6 and 14-dpp  
377 *Prdm9*<sup>Set-/Set-</sup> seminiferous tubule cross sections. Green, CXXC1; red, PRDM9; blue, DAPI. SC,  
378 Sertoli cell; Z, zygonema; P, pachynema; RS, round spermatid. Scale bars, first 4 columns: 50  
379  $\mu\text{m}$ , last column: 10  $\mu\text{m}$ .

380 (B) Immunostaining of CXXC1 and PRDM9 on chromosome spreads from adult B6. Green,  
381 SYCP3; orange, PRDM9; magenta, CXXC1. Scale bar, 10  $\mu\text{m}$ .

382

### 383 **Fig 3. Knockout of CXXC1 does not affect male fertility or testis histology.**

384 (A) Western blot of CXXC1 with adult B6, *Cxxc1* het and CKO testicular extract.  $\beta$ -tubulin was  
385 used as internal loading control.

386 (B) Immunostaining of CXXC1 on *Cxxc1* het and CKO seminiferous tubule cross sections. Scale  
387 bar, 50  $\mu\text{m}$ . Long arrows, Sertoli cells; short arrows, spermatogonia; arrowhead, spermatocytes.



388 (C) Fertility tests in B6, *Cxxc1* het and CKO mice. The number of viable pups was shown.  
389 (D) Testis index (testis weight/body weight) in B6, *Cxxc1* het and CKO mice.  
390 (E) Histology of testis and epididymis in *Cxxc1* control and CKO mice. Top panels, PAS staining  
391 of seminiferous tubule sections; scale bar, 100  $\mu\text{m}$ . Bottom panels, H&E staining of epididymis  
392 sections; scale bar, 200  $\mu\text{m}$ . Left panels, het control; right panels, *Cxxc1* CKO.

393

394 **Fig 4. PRDM9 expression and catalytic function are not impaired in *Cxxc1* CKO.**

395 (A) Immunostaining of PRDM9 in adult *Cxxc1* het and CKO seminiferous tubules. Scale bar, 50  
396  $\mu\text{m}$ .

397 (B) Co-immunostaining of CXXC1 and PRDM9 on chromosome spreads from adult *Cxxc1* het  
398 and CKO mice. Green, SYCP3; orange, PRDM9; magenta, CXXC1. First 4 rows, het control;  
399 last 4 rows, *Cxxc1* CKO. Scale bar, 10  $\mu\text{m}$ .

400 (C) Immunostaining of H3K4me3 in adult *Cxxc1* het and CKO seminiferous tubules. Green,  
401 SYCP3; magenta, H3K4me3. Scale bar, 10  $\mu\text{m}$ .

402 (D) H3K4me3 ChIP-qPCR with chromatin isolated from *Cxxc1* het and CKO mice. Promoter  
403 regions from *Actinb* and *Sycp3*, *Dom2* hotspots *Pbx1* and *Fcgr4* were amplified. *Cst* hotspot *Hlx1*  
404 was used as a negative control. Bars present mean  $\pm$  SD of three biological replicates.

405

406 **Fig 5. No major meiotic defects observed in *Cxxc1* CKO testis.**

407 (A) Immunostaining of SYCP3 and SYCP1 on adult *Cxxc1* het and CKO chromosome spreads.  
408 Green, SYCP3; orange, SYCP1. Scale bar, 10  $\mu\text{m}$ .

409 (B) DMC1 staining on *Cxxc1* control (n = 38) and CKO (n = 47) chromosome spread. Scale bar,  
410 10  $\mu\text{m}$ . Distribution plot of DMC1 foci in leptotene and zygotene spermatocytes was shown on  
411 the lower panel. Bars represent mean  $\pm$  SD.  $p = 0.73$  by Student's t-test.

412 (C) Immunostaining of SYCP3 and  $\gamma$ H2AX on adult *Cxxc1* het and CKO chromosome spreads.

413 Green, SYCP3; magenta,  $\gamma$ H2AX. Scale bar, 10  $\mu$ m.

414 (D) Crossover number was measured by MLH1 staining on chromosome spreads of adult

415 *Cxxc1* het (n = 31) and CKO (n = 32) spermatocytes. Magenta, SYCP3; green, MLH1; blue,

416 DAPI. The distribution plot of MLH1 foci in pachytene spermatocytes was shown on the lower

417 panel. Bars represent mean  $\pm$  SD.  $p = 0.38$  by Student's t-test.

418

## 419 **Supporting Information**

### 420 **Fig S1. H3K4me3 staining on *Cxxc1* CKO seminiferous tubule cross sections.**

421 Immunofluorescence staining of H3K4me3 on adult *Cxxc1* het and CKO seminiferous tubule

422 cross sections. Magenta, H3K4me3; Gray, DAPI. Scale bars: 50  $\mu$ m.

423

## 424 **References**

425 1. Kleckner N (1996) Meiosis: How could it work? Proceedings of the National Academy of

426 Sciences of the United States of America 93: 8167-8174.

427 2. Parvanov ED, Petkov PM, Paigen K (2010) Prdm9 controls activation of mammalian

428 recombination hotspots. Science 327: 835.

429 3. Berg IL, Neumann R, Lam KW, Sarbajna S, Odenthal-Hesse L, et al. (2010) PRDM9 variation

430 strongly influences recombination hot-spot activity and meiotic instability in humans. Nat

431 Genet 42: 859-863.

432 4. Baudat F, Buard J, Grey C, Fledel-Alon A, Ober C, et al. (2010) PRDM9 Is a Major

433 Determinant of Meiotic Recombination Hotspots in Humans and Mice. Science 327: 836-

434 840.

- 435 5. Powers NR, Parvanov ED, Baker CL, Walker M, Petkov PM, et al. (2016) The Meiotic  
436 Recombination Activator PRDM9 Trimethylates Both H3K36 and H3K4 at  
437 Recombination Hotspots In Vivo. *PLoS Genet* 12: e1006146.
- 438 6. Baker CL, Walker M, Kajita S, Petkov PM, Paigen K (2014) PRDM9 binding organizes  
439 hotspot nucleosomes and limits Holliday junction migration. *Genome Res* 24: 724-732.
- 440 7. Smagulova F, Gregoret IV, Brick K, Khil P, Camerini-Otero RD, et al. (2011) Genome-wide  
441 analysis reveals novel molecular features of mouse recombination hotspots. *Nature* 472:  
442 375-378.
- 443 8. Brick K, Smagulova F, Khil P, Camerini-Otero RD, Petukhova GV (2012) Genetic  
444 recombination is directed away from functional genomic elements in mice. *Nature* 485:  
445 642-645.
- 446 9. Yamada S, Kim S, Tischfield SE, Jasin M, Lange J, et al. (2017) Genomic and chromatin  
447 features shaping meiotic double-strand break formation and repair in mice. *Cell Cycle* 16:  
448 1870-1884.
- 449 10. Mimitou EP, Yamada S, Keeney S (2017) A global view of meiotic double-strand break end  
450 resection. *Science* 355: 40-45.
- 451 11. Zickler D, Kleckner N (2015) Recombination, Pairing, and Synapsis of Homologs during  
452 Meiosis. *Cold Spring Harb Perspect Biol* 7.
- 453 12. Hunter N (2015) Meiotic Recombination: The Essence of Heredity. *Cold Spring Harb*  
454 *Perspect Biol* 7.
- 455 13. Panizza S, Mendoza MA, Berlinger M, Huang L, Nicolas A, et al. (2011) Spo11-accessory  
456 proteins link double-strand break sites to the chromosome axis in early meiotic  
457 recombination. *Cell* 146: 372-383.
- 458 14. Kohler S, Wojcik M, Xu K, Dernburg AF (2017) Superresolution microscopy reveals the  
459 three-dimensional organization of meiotic chromosome axes in intact *Caenorhabditis*  
460 *elegans* tissue. *Proc Natl Acad Sci U S A* 114: E4734-E4743.

- 461 15. Parvanov ED, Tian H, Billings T, Saxl RL, Spruce C, et al. (2017) PRDM9 interactions with  
462 other proteins provide a link between recombination hotspots and the chromosomal axis  
463 in meiosis. *Mol Biol Cell* 28: 488-499.
- 464 16. Diagouraga B, Clement JAJ, Duret L, Kadlec J, de Massy B, et al. (2018) PRDM9  
465 Methyltransferase Activity Is Essential for Meiotic DNA Double-Strand Break Formation  
466 at Its Binding Sites. *Mol Cell*.
- 467 17. Acquaviva L, Szekvolgyi L, Dichtl B, Dichtl BS, de La Roche Saint Andre C, et al. (2013)  
468 The COMPASS subunit Spp1 links histone methylation to initiation of meiotic  
469 recombination. *Science* 339: 215-218.
- 470 18. Sommermeyer V, Beneut C, Chaplais E, Serrentino ME, Borde V (2013) Spp1, a member of  
471 the Set1 Complex, promotes meiotic DSB formation in promoters by tethering histone  
472 H3K4 methylation sites to chromosome axes. *Mol Cell* 49: 43-54.
- 473 19. Adam C, Guerois R, Citarella A, Verardi L, Adolphe F, et al. (2018) The PHD finger protein  
474 Spp1 has distinct functions in the Set1 and the meiotic DSB formation complexes. *PLoS*  
475 *Genet* 14: e1007223.
- 476 20. Thomson JP, Skene PJ, Selfridge J, Clouaire T, Guy J, et al. (2010) CpG islands influence  
477 chromatin structure via the CpG-binding protein Cfp1. *Nature* 464: 1082-1086.
- 478 21. Clouaire T, Webb S, Bird A (2014) Cfp1 is required for gene expression-dependent H3K4  
479 trimethylation and H3K9 acetylation in embryonic stem cells. *Genome Biol* 15: 451.
- 480 22. Clouaire T, Webb S, Skene P, Illingworth R, Kerr A, et al. (2012) Cfp1 integrates both CpG  
481 content and gene activity for accurate H3K4me3 deposition in embryonic stem cells.  
482 *Genes Dev* 26: 1714-1728.
- 483 23. Carlone DL, Skalnik DG (2001) CpG binding protein is crucial for early embryonic  
484 development. *Mol Cell Biol* 21: 7601-7606.
- 485 24. Imai Y, Baudat F, Taillepierre M, Stanzione M, Toth A, et al. (2017) The PRDM9 KRAB  
486 domain is required for meiosis and involved in protein interactions. *Chromosoma*.

- 487 25. Stanzione M, Baumann M, Papanikos F, Dereli I, Lange J, et al. (2016) Meiotic DNA break  
488 formation requires the unsynapsed chromosome axis-binding protein IHO1 (CCDC36) in  
489 mice. *Nature Cell Biology* 18: 1208-+.
- 490 26. Sun F, Fujiwara Y, Reinholdt LG, Hu J, Saxl RL, et al. (2015) Nuclear localization of PRDM9  
491 and its role in meiotic chromatin modifications and homologous synapsis. *Chromosoma*.
- 492 27. Yu C, Fan X, Sha QQ, Wang HH, Li BT, et al. (2017) CFP1 Regulates Histone H3K4  
493 Trimethylation and Developmental Potential in Mouse Oocytes. *Cell Rep* 20: 1161-1172.
- 494 28. Libby BJ, Reinholdt LG, Schimenti JC (2003) Positional cloning and characterization of Mei1,  
495 a vertebrate-specific gene required for normal meiotic chromosome synapsis in mice.  
496 *Proc Natl Acad Sci U S A* 100: 15706-15711.
- 497 29. Kumar R, Ghyselinck N, Ishiguro K, Watanabe Y, Kouznetsova A, et al. (2015) MEI4 - a  
498 central player in the regulation of meiotic DNA double-strand break formation in the  
499 mouse. *J Cell Sci* 128: 1800-1811.
- 500 30. Kumar R, Bourbon HM, de Massy B (2010) Functional conservation of Mei4 for meiotic DNA  
501 double-strand break formation from yeasts to mice. *Genes Dev* 24: 1266-1280.
- 502 31. Daniel K, Lange J, Hached K, Fu J, Anastassiadis K, et al. (2011) Meiotic homologue  
503 alignment and its quality surveillance are controlled by mouse HORMAD1. *Nat Cell Biol*  
504 13: 599-610.
- 505 32. Wojtasz L, Cloutier JM, Baumann M, Daniel K, Varga J, et al. (2012) Meiotic DNA double-  
506 strand breaks and chromosome asynapsis in mice are monitored by distinct HORMAD2-  
507 independent and -dependent mechanisms. *Genes Dev* 26: 958-973.
- 508 33. Qin S, Min J (2014) Structure and function of the nucleosome-binding PWWP domain.  
509 *Trends Biochem Sci* 39: 536-547.
- 510 34. Myrick LK, Hashimoto H, Cheng XD, Warren ST (2015) Human FMRP contains an integral  
511 tandem Agenet (Tudor) and KH motif in the amino terminal domain. *Human Molecular*  
512 *Genetics* 24: 1733-1740.

- 513 35. Carofiglio F, Sleddens-Linkels E, Wassenaar E, Inagaki A, van Cappellen WA, et al. (2018)  
514 Repair of exogenous DNA double-strand breaks promotes chromosome synapsis in  
515 SPO11-mutant mouse meiocytes, and is altered in the absence of HORMAD1. DNA  
516 Repair (Amst) 63: 25-38.
- 517 36. Smagulova F, Brick K, Pu Y, Camerini-Otero RD, Petukhova GV (2016) The evolutionary  
518 turnover of recombination hot spots contributes to speciation in mice. Genes Dev 30:  
519 266-280.
- 520 37. Auton A, Li YR, Kidd J, Oliveira K, Nadel J, et al. (2013) Genetic Recombination Is Targeted  
521 towards Gene Promoter Regions in Dogs. Plos Genetics 9.
- 522 38. Axelsson E, Webster MT, Ratnakumar A, Consortium L, Ponting CP, et al. (2012) Death of  
523 PRDM9 coincides with stabilization of the recombination landscape in the dog genome.  
524 Genome Res 22: 51-63.
- 525 39. Munoz-Fuentes V, Di Rienzo A, Vila C (2011) Prdm9, a major determinant of meiotic  
526 recombination hotspots, is not functional in dogs and their wild relatives, wolves and  
527 coyotes. PLoS One 6: e25498.
- 528 40. Campbell CL, Bherer C, Morrow BE, Boyko AR, Auton A (2016) A Pedigree-Based Map of  
529 Recombination in the Domestic Dog Genome. G3-Genes Genomes Genetics 6: 3517-  
530 3524.
- 531 41. Tate CM, Lee JH, Skalnik DG (2010) CXXC finger protein 1 restricts the Setd1A histone  
532 H3K4 methyltransferase complex to euchromatin. FEBS J 277: 210-223.
- 533 42. Narasimhan VM, Hunt KA, Mason D, Baker CL, Karczewski KJ, et al. (2016) Health and  
534 population effects of rare gene knockouts in adult humans with related parents. Science  
535 352: 474-477.
- 536 43. Hayashi K, Yoshida K, Matsui Y (2005) A histone H3 methyltransferase controls epigenetic  
537 events required for meiotic prophase. Nature 438: 374-378.

- 538 44. Peters AH, Plug AW, van Vugt MJ, de Boer P (1997) A drying-down technique for the  
539 spreading of mammalian meiocytes from the male and female germline. Chromosome  
540 Res 5: 66-68.
- 541 45. Billings T, Parvanov ED, Baker CL, Walker M, Paigen K, et al. (2013) DNA binding  
542 specificities of the long zinc-finger recombination protein PRDM9. Genome Biol 14: R35.  
543  
544

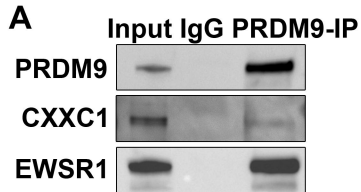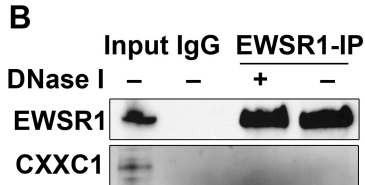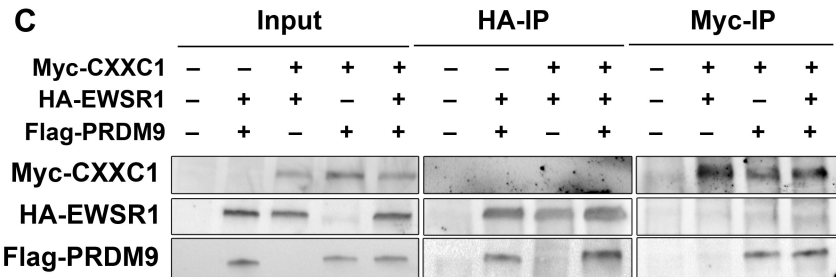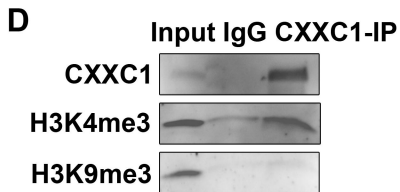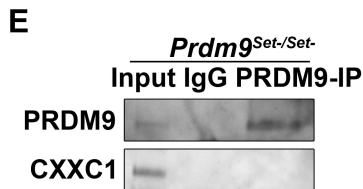



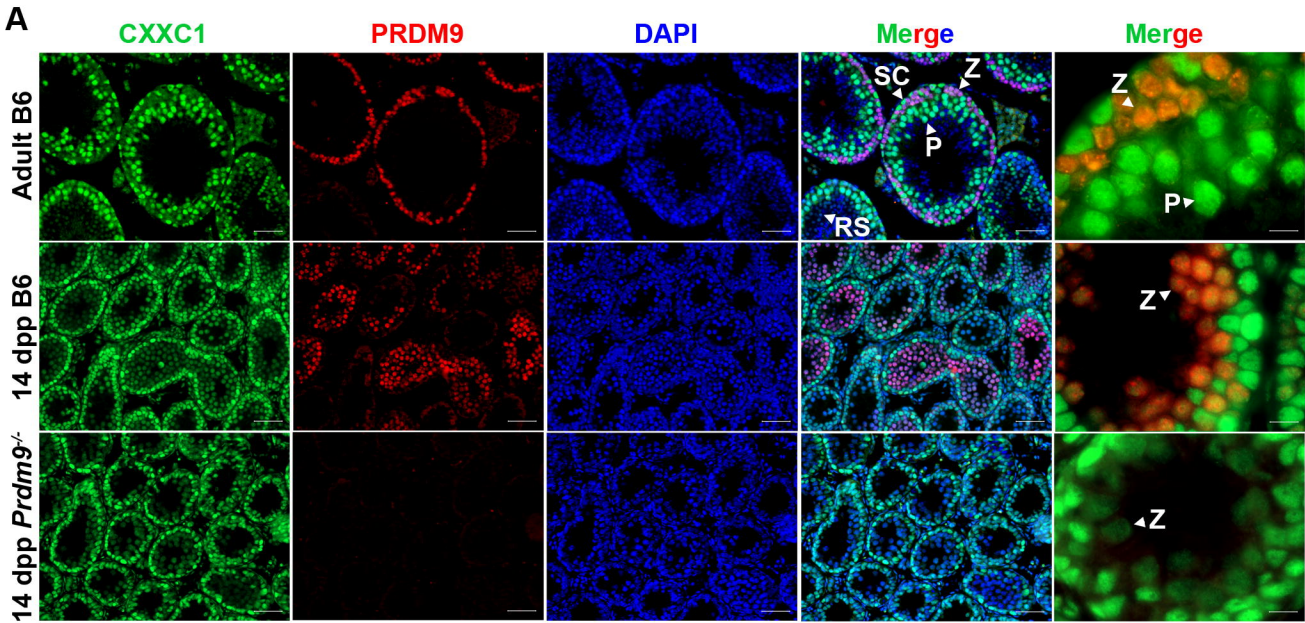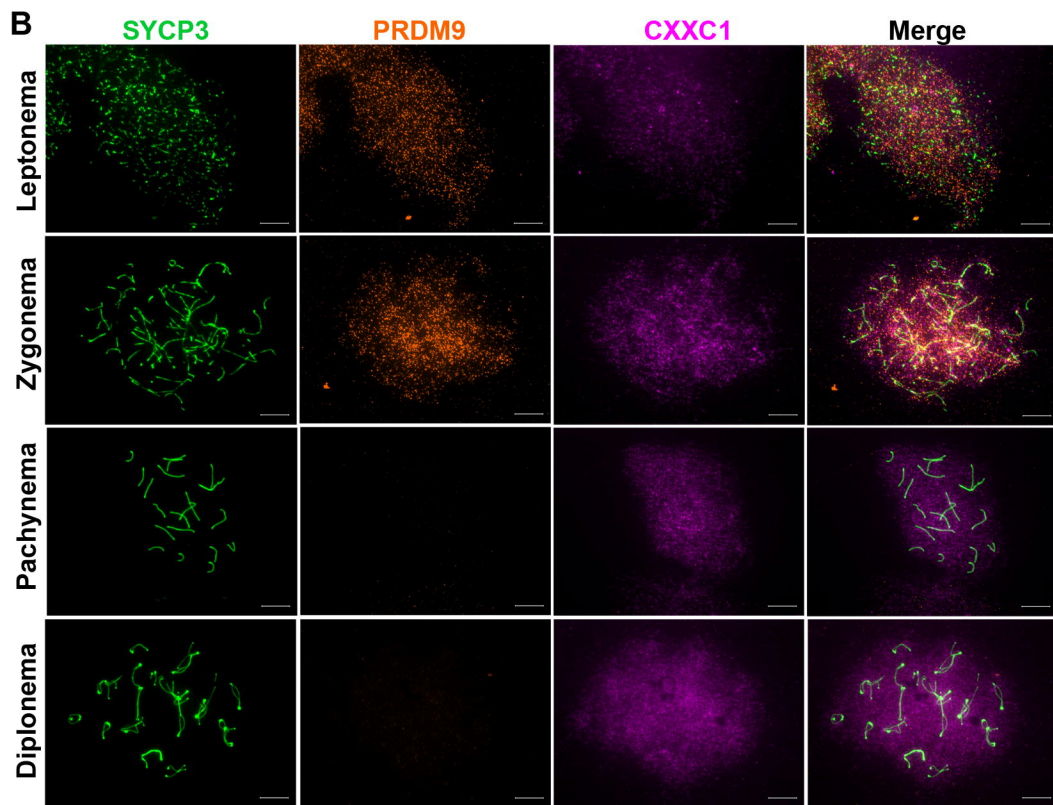

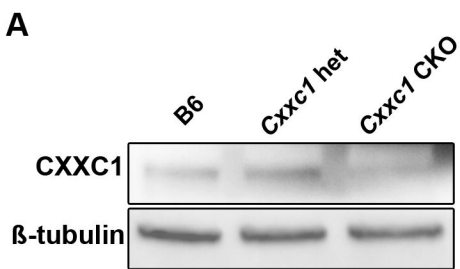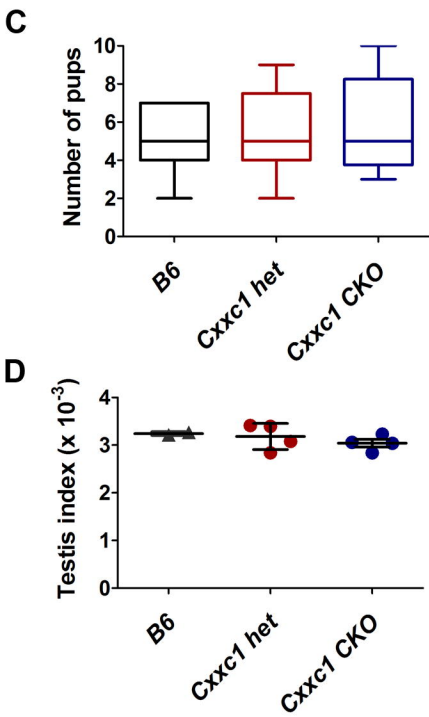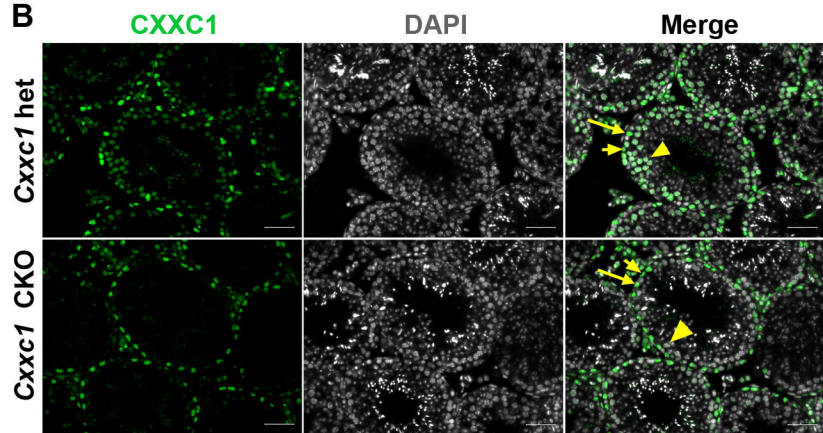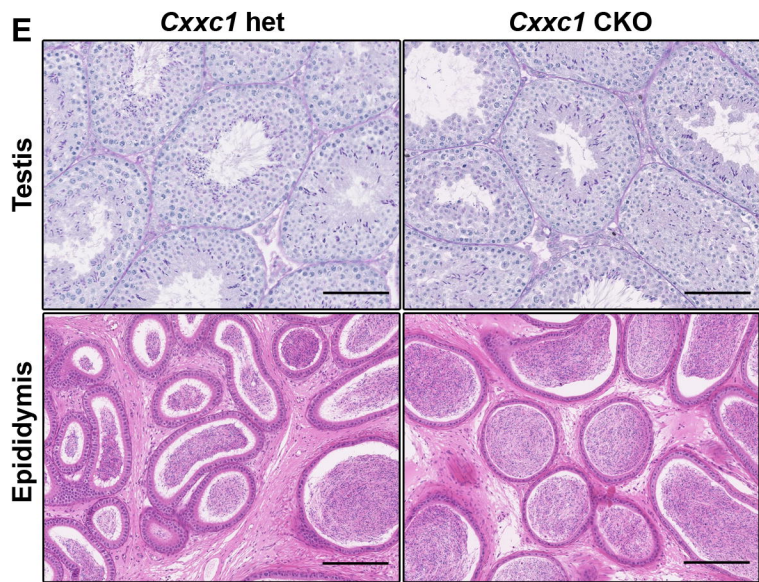

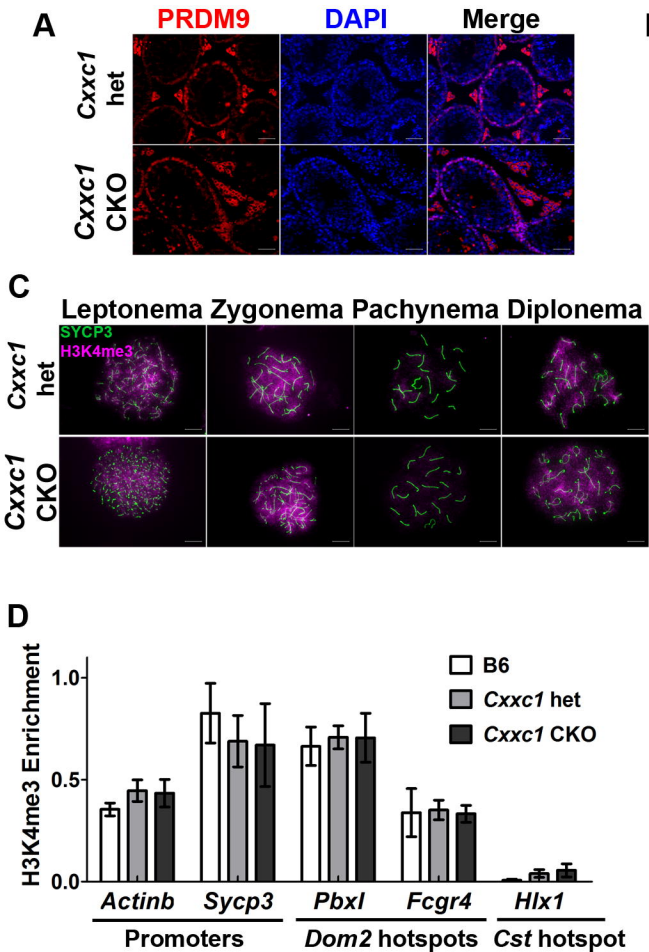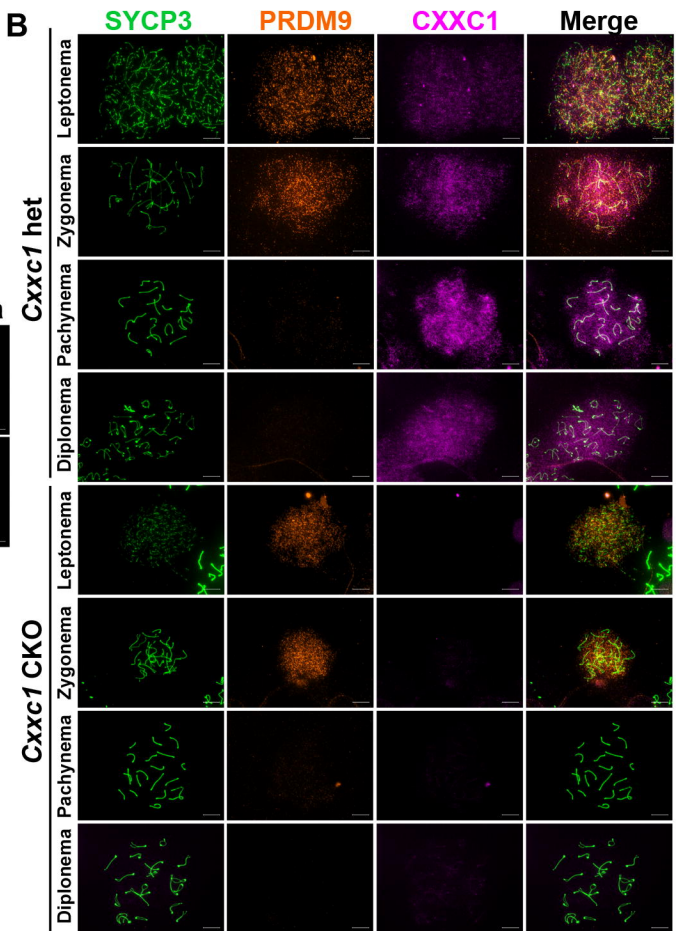

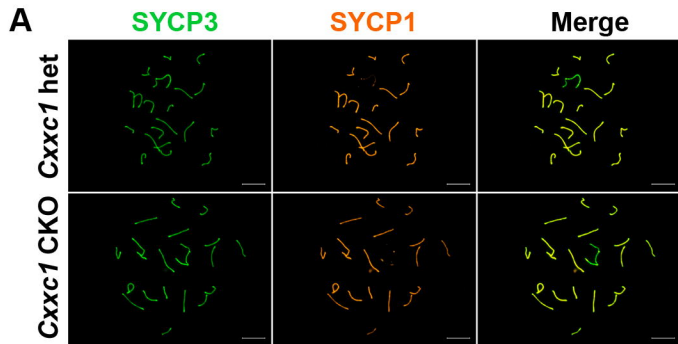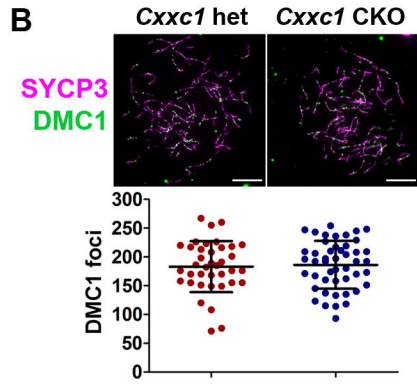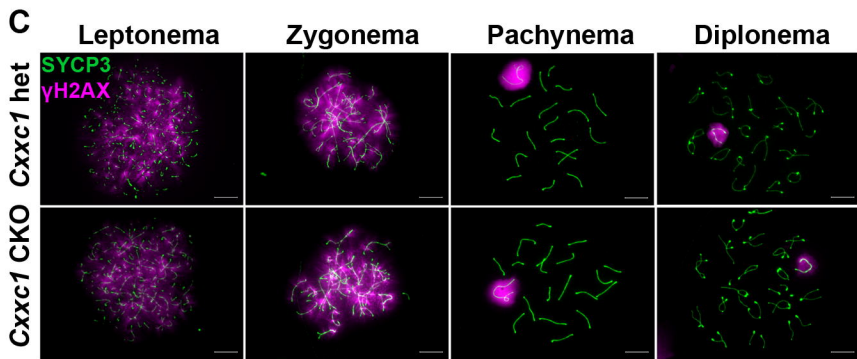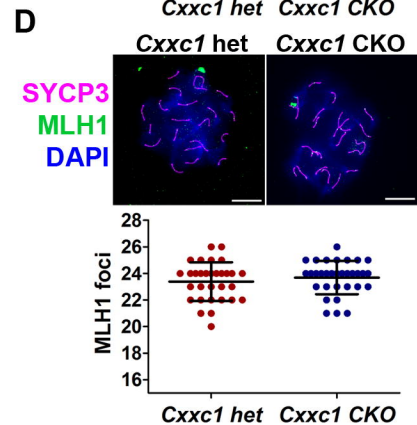

H3K4me3

DAPI

Merge

**Cxxc1** het

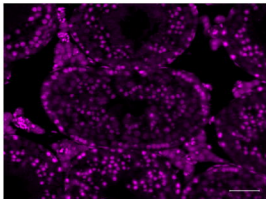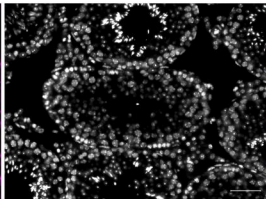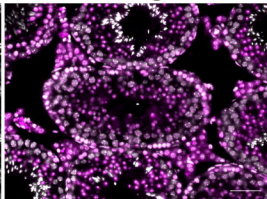

**Cxxc1** CKO

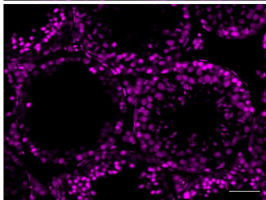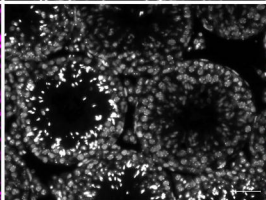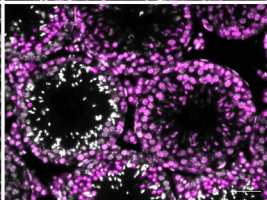

Source: http://biorxiv.org/content/10.1101/305508v1.full.pdf
